# Supplementary material for: Colorimetric detection of lipopolysaccharides based on a lipopolysaccharide-binding peptide and AuNPs
Source: Royal Society of Chemistry journal article supplement (doi:10.1039/c6ay02371a), 2016-01-01
Supplement: c6ay02371a1.pdf [file c6ay02371a1.pdf]

## **Colorimetric detection of lipopolysaccharides based on lipopolysaccharides-binding peptide and AuNPs**

Chunyang Lei<sup>a</sup>, Zhaohui Qiao<sup>a</sup>, Yingchun Fu<sup>a</sup>, Yanbin Li <sup>\* a b</sup>

<sup>a</sup> College of Biosystems Engineering and Food Science, Zhejiang University, Hangzhou 310058, China

<sup>b</sup> Department of Biological and Agricultural Engineering, University of Arkansas, Fayetteville, Arkansas 72701, the United States

\* E-mail: yanbinli@zju.edu.cn. Tel: (+) 86-571-88982536.

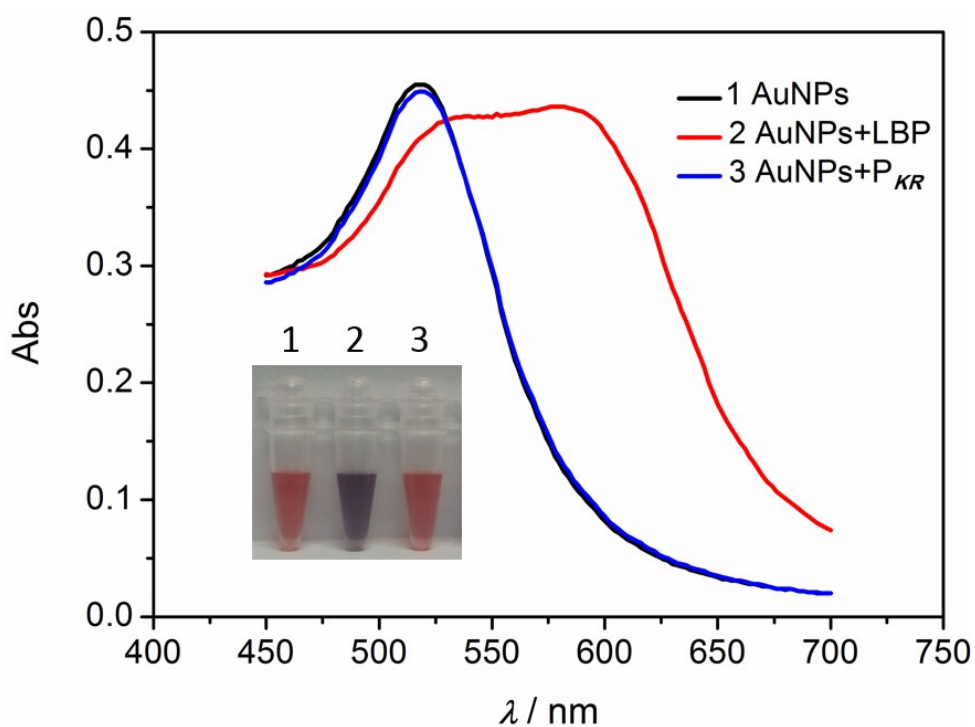

**Figure S1.** Absorption spectra and color changes of AuNPs in (1) assay buffer, (2) LBP solution and (3)  $P_{KR}$  solution and, respectively. The concentrations of the peptide probes are 1.0  $\mu\text{M}$ .

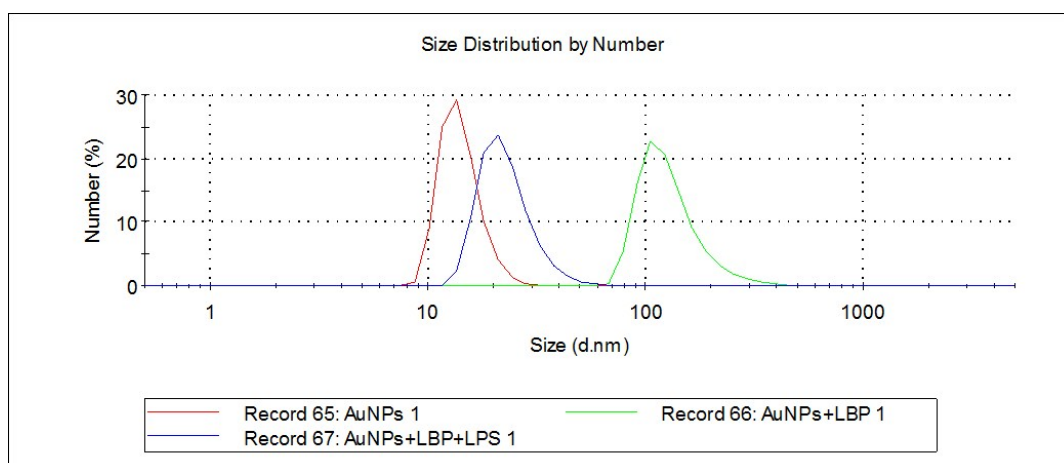

**Figure S2.** Characterization of the peptide and AuNPs assembly by dynamic light scattering (DLS). Red: AuNPs; green: AuNPs treated with LBP; blue: AuNPs treated with LBP and LPS.

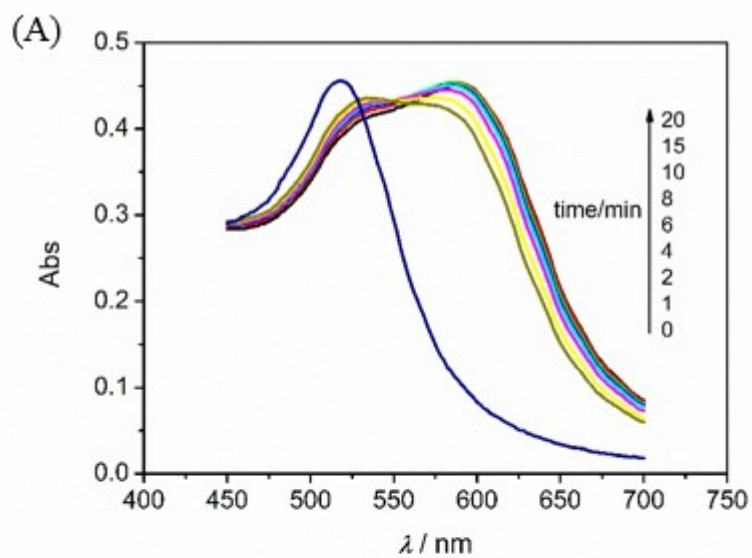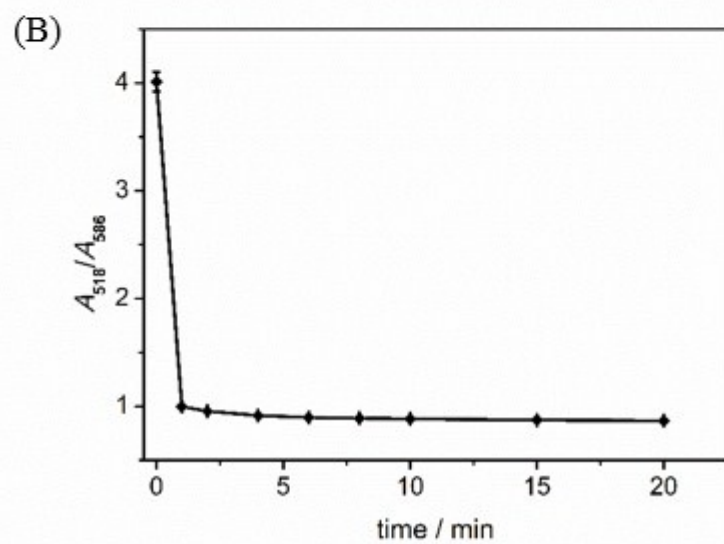

**Figure S3.** The absorption spectra of AuNPs (A) and the values of  $A_{518}/A_{586}$  (B) at different times after the addition of 1.0  $\mu\text{M}$  LBP.

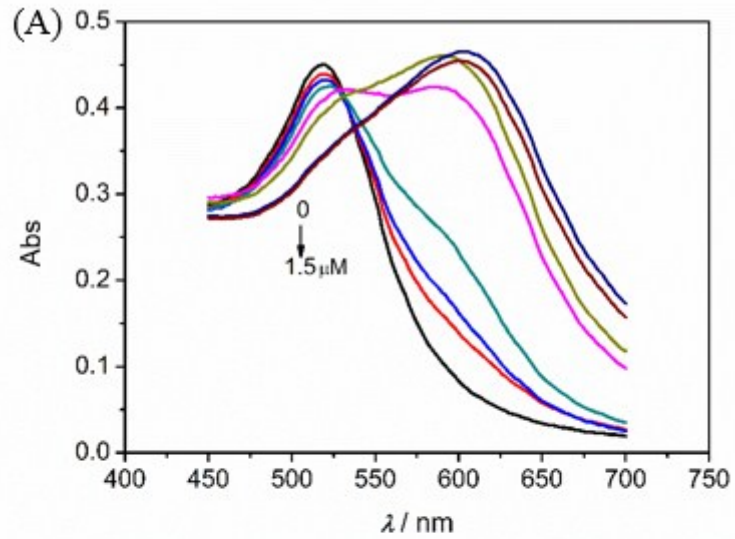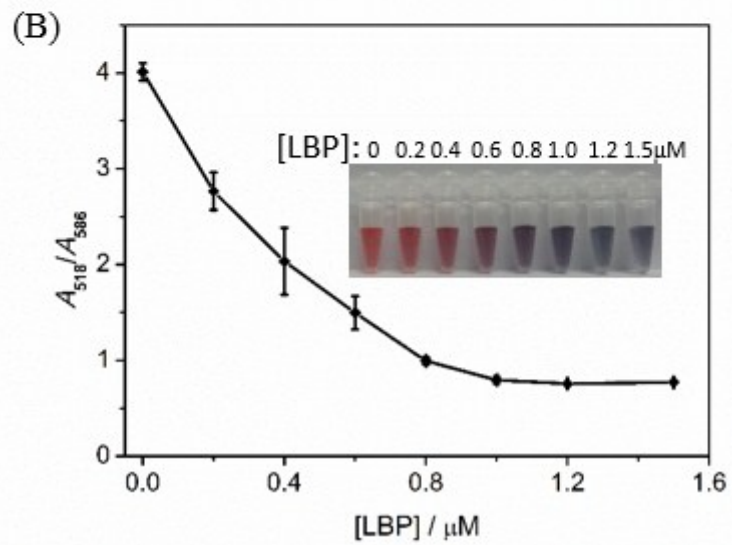

**Figure S4.** The absorption spectra of AuNPs (A) and the values of  $A_{518}/A_{586}$  (B) with different concentrations of LBP. Inset is the color changes of AuNPs solution with the concentration of LBP increasing.

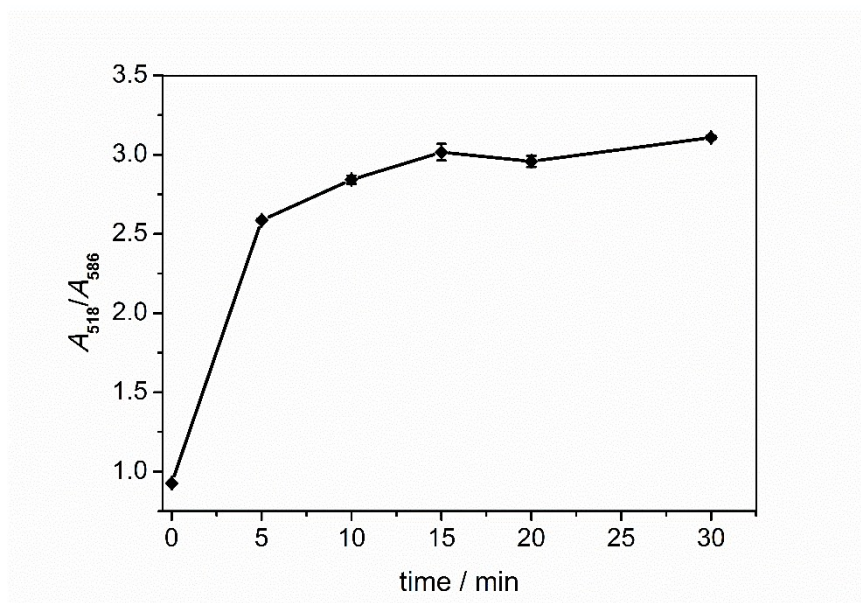

**Figure S5.** Effects of incubation time between LBP and LPS on the colorimetric responses. The concentrations of LBP and LPS are 1.0  $\mu\text{M}$  and 1.5  $\mu\text{M}$ , respectively.

Table S1 Comparison of various methods for LPS detection.

| Probe               | Method       | LOD (nM) | Reference |
|---------------------|--------------|----------|-----------|
| Pyrene derivative   | Fluorometric | 100      | 13        |
| Dye labeled peptide | Fluorometric | 150      | 23        |
| Peptide-perylene    | Fluorometric | 28       | 24        |
| Peptide/AuNPs       | Colorimetric | 2        | This work |
